# Supplementary material
Source: publisher site journal article supplement (https://www.dovepress.com/article/287572)
Supplement: Supplementary file 1 [file get_supplementary_file.php]

Supplement Table 1. Perioperative use of glucocorticoids

| Variables | All patients (n=215) | Full cohort (n=215) | | Matched cohort (n=128) | |
| --- | --- | --- | --- | --- | --- |
| With glucocorticoids (n=112) | Without glucocorticoids (n=103) | With glucocorticoids (n=64) | Without glucocorticoids (n=64) |
| Intraoperative dexamethasone | 89 (41.4%) | 89 (79.5%) | 0 (0.0%) | 54 (84.4%) | 0 (0.0%) |
| 5 mg | 32 | 32 | 0 | 15 | 0 |
| 10 mg | 57 | 57 | 0 | 39 | 0 |
| Intraoperative methylprednisolone | 23 (10.7%) | 23 (20.5%) | 0 (0.0%) | 10 (15.6%) | 0 (0.0%) |
| 40mg | 1 | 1 | 0 | 1 | 0 |
| 60 mg | 3 | 3 | 0 | 1 | 0 |
| 80 mg | 19 | 19 | 0 | 8 | 0 |
| Postoperative dexamethasone | 9 (4.2%) | 9 (8.0%) | 0 (0.0%) | 5 (7.8%) | 0 (0.0%) |
| 5 mg | 5 | 5 | 0 | 2 | 0 |
| 10 mg | 4 | 4 | 0 | 3 | 0 |

Results are presented as number (%).

Supplement Table 2. Perioperative use of opioids

| Variable | All patients (n=215) | Full cohort (n=215) | | | Matched cohort (n=128) | | |
| --- | --- | --- | --- | --- | --- | --- | --- |
| With glucocorticoids (n=112) | Without glucocorticoids (n=103) | P value | With glucocorticoids (n=64) | Without glucocorticoids (n=64) | P value |
| Intraoperative opioids |  |  |  |  |  |  |  |
| Fentanyl | 76 (35.3%) | 34 (30.4%) | 42 (40.8%) | 0.118 | 23 (35.9%) | 19 (29.7%) | 0.573 |
| Fentanyl dosage (ug)a | 150 (100-200) | 120 (100-200) | 200 (100-200) | **0.049** | 120 (100-200) | 100 (100-200) | 0.983 |
| Sufentanil | 139 (64.7%) | 77 (68.8%) | 62 (60.2%) | 0.202 | 44 (46.8%) | 47 (50.0%) | 0.697 |
| Sufentanil dose (ug) a | 20 (15-30) | 20 (15-30) | 25 (20-30) | 0.888 | 20 (15-30) | 25 (20-35) | 0.115 |
| Oxycodone | 36 (16.7%) | 28 (25.0%) | 8 (7.8%) | **0.001** | 12 (18.8%) | 8 (12.5%) | 0.466 |
| Oxycodone dose (mg)a | 12 (5-20) | 12 (10-20) | 10 (5-20) | **0.005** | 13 (12-20) | 10 (5-20) | 0.393 |
| Dezocine | 58 (27.0%) | 41 (36.6%) | 17 (16.5%) | **0.001** | 19 (29.7%) | 16 (25.%) | 0.692 |
| Dezocine dose (mg) a | 10 (10-18) | 10 (10-20) | 10 (10-12) | **<0.001** | 10 (10-20) | 10 (10-12) | 0.272 |
| Postoperative opioids |  |  |  |  |  |  |  |
| None b | 13 (6.0%) | 2 (1.8%) | 11 (10.7%) | **0.008** | 1 (1.6%) | 3 (4.7%) | 0.619 |
| Morphine | 12 (5.6%) | 5 (4.5%) | 7 (6.8%) | 0.558 | 4 (6.3%) | 0 (0.0%) | 0.119 |
| Morphine dose (mg) a | 30 (10-100) | 30 (10-100) | 50 (8-100) | 0.500 | 30 (10-80) | 0 (0-0) | 0.082 |
| Fentanyl | 5 (2.3%) | 3 (2.7%) | 2 (1.9%) | >0.999 | 2 (3.1%) | 1 (1.6%) | >0.999 |
| Fentanyl dosage (ug) a | 500 (400-500) | 500 (400-500) | 500 (200-500) | 0.527 | 500 (400-500) | 500 (500-500) | 0.622 |
| Sufentanil | 143 (66.5%) | 78 (69.6%) | 65 (63.1%) | 0.316 | 44 (6.9%) | 47 (73.4%) | 0.697 |
| Sufentanil dose (ug) a | 300 (225-300) | 300 (225-300) | 300 (225-300) | 0.526 | 300 (225-300) | 300 (225-300) | 0.770 |
| Oxycodone | 23 (10.7%) | 18 (16.1%) | 5 (4.9%) | **0.008** | 9 (14.1%) | 4 (6.3%) | 0.241 |
| Oxycodone dose (mg)a | 30 (20-40) | 20 (20-30) | 60 (40-75) | 0.298 | 20 (10-20) | 40 (40-75) | 0.941 |
| Dezocine | 65 (30.2%) | 43 (38.4%) | 22 (21.4%) | **0.008** | 19 (29.7%) | 19 (29.7%) | >0.999 |
| Dezocine dose (mg) a | 65 (55-70) | 10 (10-20) | 60 (50-70) | **0.007** | 10 (10-20) | 60 (50-70) | 0.955 |

Results are presented as number (%) or median (interquartile range). P values in bold indicate those of <0.05.

a Dose of patients who received the medication.

b These patients received epidural analgesia through epidural catheter and only local anesthetics were used.

Supplement Table 3. Perioperative use of NSAIDs

| Variable | All patients (n=215) | Full cohort (n=215) | | | Matched cohort (n=128) | | |
| --- | --- | --- | --- | --- | --- | --- | --- |
| With glucocorticoids (n=112) | Without glucocorticoids  (n=103) | P value | With glucocorticoids (n=64) | Without glucocorticoids  (n=64) | P value |
| Intraoperative flurbiprofen axetil | 99 (46.0%) | 48 (42.9%) | 51 (49.5%) | 0.341 | 33 (51.6%) | 35 (54.7%) | 0.860 |
| 50 mg | 2 | 1 | 1 | -- | 1 | 1 | -- |
| 100 mg | 94 | 45 | 49 | -- | 31 | 34 | -- |
| 200 mg | 3 | 2 | 1 | -- | 1 | 0 | -- |
| Postoperative flurbiprofen axetil | 102 (47.4%) | 51 (45.5%) | 51 (49.5%) | 0.586 | 35 (54.7%) | 38 (59.4%) | 0.721 |
| 100 mg | 5 | 2 | 3 | -- | 2 | 1 | -- |
| 150 mg | 3 | 0 | 3 | -- | 0 | 3 | -- |
| 200 mg | 40 | 17 | 23 | -- | 12 | 17 | -- |
| 250 mg | 3 | 3 | 0 | -- | 1 | 0 | -- |
| 300 mg | 45 | 25 | 20 | -- | 18 | 15 | -- |
| 350 mg | 1 | 1 | 0 | -- | 1 | 0 | -- |
| 400 mg | 5 | 3 | 2 | -- | 1 | 2 | -- |
| Intraoperative parecoxib | 20 (9.3%) | 13 (11.6%) | 7 (6.8%) | 0.249 | 7 (10.9%) | 6 (9.4%) | >0.999 |
| 20 mg | 2 | 1 | 1 | -- | 1 | 1 | -- |
| 40 mg | 9 | 5 | 4 | -- | 2 | 3 | -- |
| 60 mg | 4 | 2 | 2 | -- | 2 | 2 | -- |
| 80 mg | 5 | 5 | 0 | -- | 2 | 0 | -- |

Results are presented as number (%).

NSAIDs, non-steroid anti-inflammatory drugs.

Supplement Table 4. Postoperative individual complications a.

| Variable | All patients (n=215) | Full cohort (n=215) | | | Matched cohort (n=128) | | |
| --- | --- | --- | --- | --- | --- | --- | --- |
| With glucocorticoids (n=112) | Without glucocorticoids (n=103) | P value | With glucocorticoids (n=64) | Without glucocorticoids (n=64) | P value |
| Acute coronary syndrome b | 1 (0.5%) | 1 (0.9%) | 0 (0.0%) | 0.521 | 1 (1.6%) | 0 (0.0%) | >0.999 |
| Atelectasis c | 7 (3.3%) | 5 (4.5%) | 2 (1.9%) | 0.448 | 2 (3.1%) | 1 (1.6%) | >0.999 |
| Pleural effusion d | 5 (2.5%) | 1 (0.9%) | 4 (3.9%) | 0.196 | 1 (1.6%) | 2 (3.1%) | >0.999 |
| Acute respiratory failure e | 2 (0.9%) | 1 (0.9%) | 1 (1.0%) | >0.999 | 1 (1.6%) | 0 (0.0%) | >0.999 |
| Respiratory infection f | 2 (0.9%) | 0 (0.0%) | 2 (1.9%) | 0.228 | 0 (0.0%) | 1 (1.6%) | >0.999 |
| Delayed gastric emptying g | 15 (7.0%) | 8 (7.1%) | 7 (6.8%) | >0.999 | 6 (9.4%) | 4 (6.3%) | 0.744 |
| Pancreatic fistula h | 12 (5.6%) | 3 (2.7%) | 9 (8.7%) | 0.074 | 1 (1.6%) | 7 (10.9%) | 0.062 |
| Hepatic insufficiency i | 6 (2.8%) | 3 (2.7%) | 3 (2.9%) | >0.999 | 1 (1.6%) | 1 (1.6%) | >0.999 |
| Biliary fistula j | 1 (0.5%) | 0 (0.0%) | 1 (1.0%) | 0.479 | 0 (0.0%) | 1 (1.6%) | >0.999 |
| Chylous fistula k | 1 (0.5%) | 0 (0.0%) | 1 (1.0%) | 0.479 | 0 (0.0%) | 0 (0.0%) | >0.999 |
| Acute kidney injury l | 2 (0.9%) | 0 (0.0%) | 2 (1.9%) | 0.228 | 0 (0.0%) | 2 (3.1%) | 0.496 |
| Postoperative bleeding m | 6 (2.8%) | 2 (1.8%) | 4 (3.9%) | 0.430 | 1 (1.6%) | 3 (4.7%) | 0.619 |
| Deep venous thrombosis n | 3 (1.4%) | 2 (1.8%) | 1 (1.0%) | >0.999 | 1 (1.6%) | 1 (1.6%) | >0.999 |
| Surgical site infection o | 6 (2.8%) | 3 (2.7%) | 3 (2.9%) | >0.999 | 2 (3.1%) | 2 (3.1%) | >0.999 |
| In-hospital death | 2 (0.9%) | 1 (0.9%) | 1 (1.0%) | >0.999 | 1 (1.6%) | 1 (1.6%) | >0.999 |

Data are median (95% confidence interval), number (%), or median (interquartile range). P values in bold indicate those of <0.05.

a Newly occurred medical events that were harmful to the patients’ recovery during postoperative hospitalization and required interventional therapy, i.e., class II-V on Clavien-Dindo classification.[27](#_ENREF_3)

b Confirmed by clinical symptoms, electrocardiographic changes and elevated cardiac troponin I levels.

c Confirmed by chest x-rays, with desaturation, and necessitated physiotherapy and/or bronchoscopy.

d Confirmed by chest X-ray and required thoracentesis or chest tube drainage.

e Arterial oxygen partial pressure <60 mmHg, with/without arterial carbon dioxide partial pressure >50 mmHg, when respirating room air.

f New infiltration on chest X-ray with fever and treated with intravenous antibiotics.

g Gastric tube drainage >800 ml/d, with no other obvious reasons.

h The concentration of pancreatic enzyme in the peritoneal drainage fluid was 3 times higher than the serum value for more than 3 days after surgery.

i Prolonged prothrombin time (>18s) and elevated serum total bilirubin concentration (>30 μmol/l or 1.7 mg/dl) within 7 days after surgery, requiring interventions.

j Bile-like fluid in the abdominal drainage fluid with a volume >100 ml per day after surgery, or bile-like fluid extracted from the local peritoneal effusion under ultrasound and computed tomography positioning.

k Triglyceride content in the liquid leakage >110 mg/dl.

l Increased serum creatinine ≥0.3 mg/dl (≥26.5 μmol/l) within 7 days after surgery.

m Required second surgery for hemostasis.

n Confirmed by lower limbs venous ultrasonography and treated with anticoagulants.

o Pus expressed from the incision, and bacteria cultured from the pus or purulent puncture extract.

Supplement Table 5. Estimated survival rate after surgery

| Variable | All patients (n=215) | Full cohort (n=215) | | Matched cohort (n=128) | |
| --- | --- | --- | --- | --- | --- |
| With glucocorticoids (n=112) | Without glucocorticoids (n=103) | With glucocorticoids (n=64) | Without glucocorticoids (n=64) |
| Recurrence-free survival rate (%) |  |  |  |  |  |
| 1 year | 44.9 (38.2-51.6) | 53.9 (44.5-63.3) | 35.3 (26.1-44.5) | 53.2 (40.8-65.5) | 36.5 (24.5-48.5) |
| 2 years | 24.6 (18.7-30.5) | 33.0 (24.0-42.0) | 15.7 (8.6-22.8) | 31.6 (19.8-43.4) | 15.9 (6.9-24.9) |
| 3 years | 13.2 (8.5-17.9) | 19.9 (12.1-27.7) | 6.1 (1.2-11.0) | 21.1 (10.7-31.5) | 7.9 (1.2-14.6) |
| 5 years | 10.8 (6.5-15.1) | 16.4 (9.1-23.7) | 4.9 (0.6-9.2) | 17.4 (7.6-27.2) | 4.2 (1.1-9.5) |
| Overall survival rate (%) |  |  |  |  |  |
| 1 year | 70.8 (64.7-76.9) | 78.4 (70.8-86.0) | 62.4 (53.0-71.8) | 73.4 (62.6-84.2) | 66.8 (55.2-78.4) |
| 2 years | 36.4 (29.9-42.9) | 45.4 (36.0-54.8) | 26.5 (17.7-35.3) | 42.1 (29.9-54.3) | 29.8 (18.4-41.2) |
| 3 years | 24.6 (18.5-30.7) | 32.9 (23.9-41.9) | 15.4 (8.0-22.8) | 28.0 (16.6-39.4) | 19.4 (9.4-29.4) |
| 5 years | 11.1 (6.2-16.0) | 16.0 (8.0-24.0) | 5.8 (0.5-11.1) | 18.6 (7.8-29.4.) | 9.7 (1.0-18.3) |

Results are presented as % (95% CI).

Supplement Table 6. Univariable association with recurrence-free and overall survival (full cohort, n=215; Cox proportional hazard ratio model).

|  | Recurrence-free survival | | | Overall survival | | |
| --- | --- | --- | --- | --- | --- | --- |
| Events/total | HR (95% CI) | P value | Events/total | HR (95% CI) | P value |
| Age (y) |  |  |  |  |  |  |
| <60 | 69/82 | 1 |  | 69/82 | 1 |  |
| 60-69 | 64/74 | 0.93 (0.66-1.31) | 0.682 | 61/74 | 0.95 (0.68-1.35) | 0.783 |
| ≥70 | 56/59 | 1.46 (1.02-2.08) | **0.037** | 52/59 | 1.52 (1.06-2.18) | **0.024** |
| Sex |  |  |  |  |  |  |
| Female | 78/90 | 1 |  | 77/90 | 1 |  |
| Male | 111/125 | 1.12 (0.84-1.50) | 0.438 | 105/125 | 1.04 (0.77-1.40) | 0.799 |
| Body mass index (kg/m2) |  |  |  |  |  |  |
| ≤24.9 | 145/163 | 1 |  | 139/163 | 1 |  |
| ≥25 | 44/52 | 0.81 (0.58-1.14) | 0.235 | 43/52 | 0.87 (0.62-1.22) | 0.411 |
| History of stroke |  |  |  |  |  |  |
| No | 182/207 | 1 |  | 175/207 | 1 |  |
| Yes | 7/8 | 1.08 (0.50-2.36) | 0.838 | 7/8 | 1.06 (0.49-2.31) | 0.880 |
| Coronary heart disease |  |  |  |  |  |  |
| No | 176/200 | 1 |  | 171/200 | 1 |  |
| Yes | 13/15 | 1.02 (0.58-1.79) | 0.953 | 11/15 | 0.985 (0.53-1.82) | 0.960 |
| Hypertension |  |  |  |  |  |  |
| No | 136/150 | 1 |  | 131/150 | 1 |  |
| Yes | 53/65 | 0.78 (0.57-1.08) | 0.419 | 51/65 | 0.856 (0.62-1.18) | 0.347 |
| Arrhythmia |  |  |  |  |  |  |
| No | 147/168 | 1 |  | 138/168 | 1 |  |
| Yes | 42/47 | 1.11 (0.79-1.56) | 0.560 | 44/47 | 1.15 (0.82-1.62) | 0.409 |
| Diabetes |  |  |  |  |  |  |
| No | 145/167 | 1 |  | 141/167 | 1 |  |
| Yes | 44/48 | 0.87 (0.62-1.22) | 0.419 | 41/48 | 0.85 (0.60-1.21) | 0.375 |
| Hepatorenal dysfunction a |  |  |  |  |  |  |
| No | 100/113 | 1 |  | 94/113 | 1 |  |
| Yes | 89/102 | 1.22 (0.91-1.62) | **0.184** | 88/102 | 1.22 (0.91-1.63) | **0.191** |
| Chronic pulmonary disease b |  |  |  |  |  |  |
| No | 167/191 | 1 |  | 164/191 | 1 |  |
| Yes | 22/24 | 0.99 (0.63-1.54) | 0.958 | 18/24 | 0.85 (0.52-1.39) | 0.528 |
| ASA grade | 0.357 |  |  |  |  |  |
| I, II | 173/197 | 1 |  | 167/197 | 1 |  |
| III | 16/18 | 1.28 (0.76-2.13) | 0.354 | 15/18 | 1.28 (0.76-2.18) | 0.357 |
| Preoperative CA19-9 |  |  |  |  |  |  |
| <240 U/ml | 94/108 | 1 |  | 94/108 | 1 |  |
| ≥240 U/ml | 95/107 | 1.21 (0.91-1.61) | **0.197** | 88/107 | 1.09 (0.81-1.46) | 0.570 |
| Preoperative albumin <35 g/L |  |  |  |  |  |  |
| No | 177/201 | 1 |  | 170/201 | 1 |  |
| Yes | 12/14 | 0.82 (0.45-1.48) | 0.507 | 12/14 | 0.93 (0.51-1.67) | 0.797 |
| Preoperative anemia c |  |  |  |  |  |  |
| No | 156/181 | 1 |  | 151/181 | 1 |  |
| Yes | 33/34 | 1.27 (0.87-1.85) | 0.218 | 31/34 | 1.20 (0.82-1.77) | 0.353 |
| Pathological diagnosis |  |  |  |  |  |  |
| Ductal adenocarcinoma | 181/203 | 1 |  | 172/203 | 1 |  |
| Others d | 8/12 | 0.39 (0.19-0.79) | **0.009** | 10/12 | 0.49 (0.26-0.95) | **0.034** |
| Maximum diameter |  |  |  |  |  |  |
| <30 mm | 98/113 | 1 |  | 98/113 | 1 |  |
| ≥30 mm | 91/102 | 1.00 (0.75-1.33) | 0.982 | 84/102 | 0.97 (0.72-1.30) | 0.821 |
| pTNM stage e |  |  |  |  |  |  |
| IA,IB,IIA | 76/90 | 1 |  | 72/90 | 1 |  |
| IIB,III,IV | 113/125 | 1.92 (1.42-2.58) | **<0.001** | 110/125 | 2.02 (1.48-2.75) | **<0.001** |
| Differentiation grade |  |  |  |  |  |  |
| Moderate and high | 105/123 | 1 |  | 79/92 | 1 |  |
| Low | 84/92 | 1.81 (1.35-2.42) | **<0.001** | 103/123 | 1.83 (1.36-2.47) | **<0.001** |
| Period of surgery |  |  |  |  |  |  |
| 2005-April 2007 | 32/35 | 1 |  | 32/35 | 1 |  |
| May 2007-2012 | 86/100 | 0.97 (0.64-1.45) | 0.876 | 87/100 | 0.93 (0.62-1.39) | 0.717 |
| 2013-2016 | 71/80 | 0.81 (0.53-1.23) | **0.079** | 63/80 | 0.68 (0.44-1.04) | **0.073** |
| Type of surgery |  |  |  |  |  |  |
| Pancreaticoduodenectomy/total pancreatectomy | 134/154 | 1 |  | 132/154 | 1 |  |
| Distal pancreatosplenectomy | 55/61 | 0.87 (0.64-1.20) | 0.401 | 50/61 | 0.86 (0.62-1.20) | 0.369 |
| Duration of surgery |  |  |  |  |  |  |
| <300 min | 91/102 | 1 |  | 87/102 | 1 |  |
| ≥300 min | 98/113 | 1.05 (0.79-1.40) | 0.748 | 95/113 | 1.03 (0.77-1.38) | 0.831 |
| Margin status |  |  |  |  |  |  |
| Negative | 165/190 | 1 |  | 159/190 | 1 |  |
| Positive | 24/25 | 2.11 (1.37-3.26) | **0.001** | 23/25 | 2.64 (1.69-4.13) | **<0.001** |
| Type of anesthesia |  |  |  |  |  |  |
| General | 177/200 | 1 |  | 168/200 | 1 |  |
| Combined | 12/15 | 0.75 (0.42-1.36) | 0.343 | 14/15 | 0.94 (0.54-1.64) | 0.838 |
| Duration of anesthesia |  |  |  |  |  |  |
| <330 min | 93/104 | 1 |  | 88/104 | 1 |  |
| ≥330 min | 96/111 | 1.08 (0.81-1.44) | 0.581 | 94/111 | 1.10 (0.82-1.47) | 0.540 |
| Use of propofol |  |  |  |  |  |  |
| No | 15/15 | 1 |  | 11/15 | 1 |  |
| Yes | 174/200 | 0.860 (0.50-1.48) | 0.587 | 171/200 | 1.34 (0.72-2.51) | 0.356 |
| Use of etomidate |  |  |  |  |  |  |
| No | 109/123 | 1 |  | 104/123 | 1 |  |
| Yes | 80/92 | 1.04 (0.78-1.39) | 0.778 | 78/92 | 1.10 (0.82-1.47) | 0.542 |
| Inhalational anesthetics |  |  |  |  |  |  |
| Sevoflurane | 134/154 | 1 |  | 128/154 | 1 |  |
| Isoflurane | 55/61 | 1.19 (0.87-1.64) | 0.272 | 54/61 | 1.36 (0.99-1.88) | **0.059** |
| Sufentanil equivalent (ug)f |  |  |  |  |  |  |
| <255 ug | 96/107 | 1 |  | 90/107 | 1 |  |
| ≥255 ug | 93/108 | 0.84 (0.63-1.12) | 0.244 | 92/108 | 0.89 (0.66-1.19) | 0.413 |
| Estimated blood loss |  |  |  |  |  |  |
| <400 ml | 110/129 | 1 |  | 100/129 | 1 |  |
| ≥400 ml | 79/86 | 1.43 (1.06-1.91) | **0.017** | 82/86 | 1.58 (1.17-2.12) | **0.002** |
| Intraoperative blood transfusion g |  |  |  |  |  |  |
| No | 146/167 | 1 |  | 140/167 | 1 |  |
| Yes | 43/48 | 1.09 (0.77-1.53) | 0.640 | 42/48 | 1.22 (0.86-1.73) | 0.265 |
| Intraoperative artificial colloid |  |  |  |  |  |  |
| <1000 ml h | 43/46 | 1 |  | 38/46 | 1 |  |
| ≥1000 ml | 146/169 | 0.81 (0.58-1.14) | 0.229 | 144/169 | 0.91 (0.63-1.31) | 0.600 |
| Perioperative NSAIDs i |  |  |  |  |  |  |
| No | 76/85 | 1 |  | 70/85 | 1 |  |
| Yes | 113/130 | 0.92 (0.69-1.23) | 0.564 | 112/130 | 0.99 (0.73-1.34) | 0.947 |
| Perioperative glucocorticoids j |  |  |  |  |  |  |
| No | 98/103 | 1 |  | 92/103 | 1 |  |
| Yes | 91/112 | 0.57 (0.43-0.77) | **<0.001** | 90/112 | 0.59 (0.44-0.79) | **<0.001** |
| Postoperative complications k |  |  |  |  |  |  |
| No | 142/164 | 1 |  | 134/164 | 1 |  |
| Yes | 47/51 | 1.48 (1.06-2.06) | **0.021** | 48/51 | 1.62 (1.16-2.25) | **0.005** |
| Postoperative radiotherapy |  |  |  |  |  |  |
| No | 169/193 | 1 |  | 167/193 | 1 |  |
| Yes | 20/22 | 1.01 (0.64-1.61) | 0.960 | 15/22 | 0.73 (0.43-1.24) | 0.240 |
| Postoperative chemotherapy |  |  |  |  |  |  |
| No | 98/112 | 1 |  | 95/112 | 1 |  |
| Yes | 91/103 | 0.66 (0.50-0.88) | **0.005** | 87/103 | 0.60 (0.45-0.81) | **0.001** |

Results are presented as median (95% CI). P values in bold indicate those of <0.20.

ASA, American Society of Anesthesiologists; pTNM stage, Tumor-Node-Metastasis stage of pancreatic cancer.

a Includes both liver (102 cases) and renal (1 case) dysfunction.

b Includes chronic bronchitis, emphysema, asthma, and old tuberculosis.

c Hb <120 g/L for male and <110 g/L for female adults.

d Includes intraductal papilloma, adeno-squamous carcinoma, neuroendocrine tumor, and mucinous adenocarcinoma.

e According to the American Joint Committee on Cancer 8th Edition Cancer Staging System.

f 1 mg morphine (iv) = 15 µg fentanyl = 1.5 µg sufentanil = 1 mg oxycodone = 1 mg dezocine [21-23].

g Packed red blood cells were transfused.

h Includes 1 patient who did not receive artificial colloids during surgery.

i Includes flurbiprofen axetil and parecoxib sodium.

j Includes dexamethasone and methylprednisolone.

k Defined as new onset conditions that required medical intervention. Includes delayed gastric emptying, biliary leak, pancreatic leak, chylous leak, surgical site infection, atelectasis, pleural effusion, pulmonary infection, acute respiratory failure, and deep vein thrombosis.

Supplement Table 7. Univariable association with recurrence-free and overall survival (matched cohort, n=128; Cox proportional hazard ratio model).

|  | Recurrence-free survival | | | Overall survival | | |
| --- | --- | --- | --- | --- | --- | --- |
| Events/total N | HR (95% CI) | P value | Events/total N | HR (95% CI) | P value |
| Age (y) |  |  |  |  |  |  |
| <60 | 41/49 | 1 |  | 40/49 | 1 |  |
| 60-69 | 37/43 | 0.93 (0.60-1.46) | 0.762 | 36/43 | 0.95 (0.61-1.50) | 0.834 |
| ≥70 | 35/36 | 1.42 (0.91-2.24) | **0.126** | 31/36 | 1.34 (0.84-2.14) | 0.226 |
| Sex |  |  |  |  |  |  |
| Female | 47/54 | 1 |  | 46/54 | 1 |  |
| Male | 66/74 | 1.12 (0.77-1.64) | 0.544 | 61/74 | 0.98 (0.67-1.44) | 0.926 |
| Body mass index (kg/m2) |  |  |  |  |  |  |
| ≤24.9 | 85/94 | 1 |  | 80/94 | 1 |  |
| ≥25 | 28/34 | 0.76 (0.49-1.160) | **0.199** | 27/34 | 0.84 (0.54-1.30) | 0.430 |
| History of stroke |  |  |  |  |  |  |
| No | 108/123 | 1 |  | 102/123 | 1 |  |
| Yes | 5/5 | 1.25 (0.49-3.18) | 0.643 | 5/5 | 1.24 (0.49-3.15) | 0.650 |
| Coronary heart disease |  |  |  |  |  |  |
| No | 103/117 | 1 |  | 98/115 | 1 |  |
| Yes | 10/11 | 1.10 (0.57-2.11) | 0.776 | 9/13 | 0.93 (0.45-1.92) | 0.846 |
| Hypertension |  |  |  |  |  |  |
| No | 79/89 | 1 |  | 76/89 | 1 |  |
| Yes | 34/39 | 1.02 (0.68-1.53) | 0.939 | 31/39 | 0.96 (0.63-1.47) | 0.860 |
| Arrhythmia |  |  |  |  |  |  |
| No | 81/94 | 1 |  | 75/94 | 1 |  |
| Yes | 32/34 | 1.28 (0.85-1.93) | 0.244 | 32/34 | 1.30 (0.86-1.97) | 0.219 |
| Diabetes |  |  |  |  |  |  |
| No | 87/100 | 1 |  | 84/100 | 1 |  |
| Yes | 26/28 | 0.84 (0.54-1.31) | 0.448 | 23/28 | 0.82 (0.52-1.30) | 0.401 |
| Hepatorenal dysfunction a |  |  |  |  |  |  |
| No | 59/67 | 1 |  | 55/67 | 1 |  |
| Yes | 54/61 | 1.63 (1.11-2.37) | **0.012** | 52/61 | 1.50 (1.02-2.20) | **0.040** |
| Chronic pulmonary disease b |  |  |  |  |  |  |
| No | 101/115 | 1 |  | 99/115 | 1 |  |
| Yes | 12/13 | 1.16 (0.63-2.11) | 0.637 | 9/13 | 0.94 (0.48-1.87) | 0.867 |
| ASA grade |  |  |  |  |  |  |
| I, II | 105/119 | 1 |  | 100/119 | 1 |  |
| III | 8/9 | 1.00 (0.49-2.07) | 0.994 | 7/9 | 0.80 (0.37-1.73) | 0.578 |
| Preoperative CA19-9 |  |  |  |  |  |  |
| <240 U/ml | 57/65 | 1 |  | 55/65 | 1 |  |
| ≥240 U/ml | 56/63 | 1.27 (0.88-1.85) | 0.207 | 52/63 | 1.23 (0.84-1.81) | 0.282 |
| Preoperative albumin <35 g/L |  |  |  |  |  |  |
| No | 104/117 | 1 |  | 98/117 | 1 |  |
| Yes | 9/11 | 0.83 (0.42-1.66) | 0.603 | 9/11 | 0.93 (0.47-1.86) | 0.838 |
| Preoperative anemia c |  |  |  |  |  |  |
| No | 93/108 | 1 |  | 90/108 | 1 |  |
| Yes | 20/20 | 1.28 (0.79-2.08) | 0.323 | 17/20 | 0.97 (0.57-1.63) | 0.896 |
| Pathological diagnosis |  |  |  |  |  |  |
| Ductal adenocarcinoma | 110/124 | 1 |  | 103/124 | 1 |  |
| Others d | 3/4 | 0.28 (0.09-0.88) | **0.030** | 4/4 | 0.39 (0.14-1.08) | **0.071** |
| Maximum diameter |  |  |  |  |  |  |
| <30 mm | 52/63 | 1 |  | 52/63 | 1 |  |
| ≥30 mm | 61/65 | 1.15 (0.79-1.67) | 0.457 | 55/66 | 1.06 (0.72-1.55) | 0.779 |
| pTNM stage e |  |  |  |  |  |  |
| IA,IB,IIA | 48/57 | 1 |  | 45/57 | 1 |  |
| IIB,III,IV | 65/71 | 2.08 (1.41-3.05) | **<0.001** | 62/71 | 1.93 (1.30-2.87) | **0.001** |
| Differentiation grade |  |  |  |  |  |  |
| Moderate and high | 59/69 | 1 |  | 56/69 | 1 |  |
| Low | 54/59 | 1.73 (1.19-2.51) | **0.004** | 51/59 | 1.73 (1.17-2.55) | **0.006** |
| Period of surgery |  |  |  |  |  |  |
| 2005-April 2007 | 10/11 | 1 |  | 11/11 | 1 |  |
| May 2007-2012 | 64/73 | 1.44 (0.74-2.83) | 0.285 | 63/73 | 1.28 (0.67-2.45) | 0.455 |
| 2013-2016 | 39/44 | 1.14 (0.56-2.31) | 0.714 | 33/44 | 0.88 (0.44-1.76) | 0.718 |
| Type of surgery |  |  |  |  |  |  |
| Pancreaticoduodenectomy/total pancreatectomy | 80/90 | 1 |  | 77/90 | 1 |  |
| Distal pancreatosplenectomy | 33/38 | 0.73 (0.48-1.10) | **0.130** | 30/38 | 0.72 (0.47-1.10) | **0.129** |
| Duration of surgery |  |  |  |  |  |  |
| <300 min | 56/64 | 1 |  | 54/64 | 1 |  |
| ≥300 min | 57/64 | 1.20 (40.85-1.79) | 0.263 | 53/64 | 1.16 (0.79-1.69) | 0.457 |
| Margin status |  |  |  |  |  |  |
| Negative | 103/118 | 1 |  | 97/118 | 1 |  |
| Positive | 10/10 | 3.73 (1.90-7.33) | **<0.001** | 10/10 | 4.02 (2.05-7.88) | **<0.001** |
| Type of anesthesia |  |  |  |  |  |  |
| General | 108/122 | 1 |  | 101/122 | 1 |  |
| Combined | 5/6 | 0.50 (0.20-1.25) | **0.137** | 6/6 | 0.71 (0.31-1.66) | 0.433 |
| Duration of anesthesia |  |  |  |  |  |  |
| <330 min | 55/63 | 1 |  | 53/63 | 1 |  |
| ≥330 min | 58/65 | 1.28 (0.88-1.85) | **0.194** | 54/65 | 1.18 (0.81-1.73) | 0.393 |
| Use of propofol |  |  |  |  |  |  |
| No | 9/9 | 1 |  | 9/9 | 1 |  |
| Yes | 104/119 | 0.76 (0.38-1.53) | 0.447 | 98/119 | 0.95 (0.48-1.90) | 0.886 |
| Use of etomidate |  |  |  |  |  |  |
| No | 63/72 | 1 |  | 58/72 | 1 |  |
| Yes | 50/56 | 1.23 (0.85-1.78) | 0.283 | 49/56 | 1.28 (0.87-1.88) | 0.204 |
| Inhalational anesthetics |  |  |  |  |  |  |
| Sevoflurane | 83/96 | 1 |  | 78/96 | 1 |  |
| Isoflurane | 30/32 | 1.53 (1.00-2.33) | **0.049** | 29/32 | 1.67 (1.08-2.57) | **0.021** |
| Sufentanil equivalent (ug)f |  |  |  |  |  |  |
| <255 μg | 58/64 | 1 |  | 54/64 | 1 |  |
| ≥255 μg | 55/64 | 0.91 (0.63-1.32) | 0.628 | 53/64 | 0.92 (0.63-1.35) | 0.664 |
| Estimated blood loss |  |  |  |  |  |  |
| <400 ml | 71/82 | 1 |  | 63/82 | 1 |  |
| ≥400 ml | 42/46 | 1.45 (0.99-2.14) | **0.059** | 44/46 | 1.59 (1.08-2.35) | **0.020** |
| Intraoperative blood transfusion g |  |  |  |  |  |  |
| No | 92/104 | 1 |  | 86/104 | 1 |  |
| Yes | 21/24 | 1.14 (0.70-1.86) | 0.594 | 21/24 | 1.18 (0.72-1.92) | 0.507 |
| Intraoperative artificial colloid |  |  |  |  |  |  |
| <1000 ml h | 25/28 | 1 |  | 23/28 | 1 |  |
| ≥1000 ml | 88/100 | 0.85 (0.54-1.33) | 0.481 | 84/100 | 0.91 (0.57-1.45) | 0.691 |
| Perioperative NSAIDs i |  |  |  |  |  |  |
| No | 37/40 | 1 |  | 32/40 | 1 |  |
| Yes | 76/88 | 1.08 (0.73-1.60) | 0.707 | 75/88 | 1.20 (0.79-1.82) | 0.387 |
| Perioperative glucocorticoids j |  |  |  |  |  |  |
| No | 61/64 | 1 |  | 56/64 | 1 |  |
| Yes | 52/64 | 0.63 (0.43-0.92) | **0.017** | 51/64 | 0.73 (0.50-1.07) | **0.107** |
| Postoperative complications k |  |  |  |  |  |  |
| No | 84/95 | 1 |  | 77/95 | 1 |  |
| Yes | 29/33 | 1.30 (0.85-1.98) | 0.229 | 30/33 | 1.53 (1.00-2.34) | **0.050** |
| Postoperative radiotherapy |  |  |  |  |  |  |
| No | 102/116 | 1 |  | 100/116 | 1 |  |
| Yes | 11/12 | 1.07 (0.57-2.00) | 0.830 | 7/12 | 0.71 (0.33-1.53) | 0.377 |
| Postoperative chemotherapy |  |  |  |  |  |  |
| No | 59/68 | 1 |  | 57/68 | 1 |  |
| Yes | 54/60 | 0.81 (0.56-1.17) | 0.250 | 50/60 | 0.73 (0.50-1.07) | **0.111** |

Results are presented as median (95% CI). P values in bold indicate those of <0.20.

ASA, American Society of Anesthesiologists; pTNM stage, Tumor-Node-Metastasis stage of pancreatic cancer.

a Includes both liver (102 cases) and renal (1 case) dysfunction.

b Includes chronic bronchitis, emphysema, asthma, and old tuberculosis.

c Hb <120 g/L for male and <110 g/L for female adults.

d Includes intraductal papilloma, adeno-squamous carcinoma, neuroendocrine tumor, and mucinous adenocarcinoma.

e According to the American Joint Committee on Cancer 8th Edition Cancer Staging System.

f 1 mg morphine (iv) = 15 µg fentanyl = 1.5 µg sufentanil = 1 mg oxycodone = 1 mg dezocine [[21-23](#_ENREF_3)].

g Packed red blood cells were transfused.

h Includes 1 patient who did not receive artificial colloids during surgery.

i Includes flurbiprofen axetil and parecoxib sodium.

j Includes dexamethasone and methylprednisolone.

k Defined as new onset conditions that required medical intervention. Includes delayed gastric emptying, biliary leak, pancreatic leak, chylous leak, surgical site infection, atelectasis, pleural effusion, pulmonary infection, acute respiratory failure, and deep vein thrombosis.
